# Supplementary material for: A three-dimensional variational data assimilation system for aerosol optical properties based on WRF-Chem: design, development, and application of assimilating Himawari-8 aerosol observations
Source: Copernicus journal article supplement (doi:10.5194/gmd-2021-215), 2021-09-29
Supplement: Supplementary file [file gmd-2021-215-AC2-supplement.pdf]

1 **Responses to the comments of Reviewer #1:**

2 We are truly grateful to yours' positive comments and thoughtful suggestions.  
3 Those comments are all valuable and very helpful for revising and improving our paper,  
4 as well as the important guiding significance to our researches. Based on these  
5 comments and suggestions, we have studied comments carefully and have made  
6 correction which we hope meet with approval. All changes made to the text are marked  
7 in red color. Below you will find our point-by-point responses to the reviewers'  
8 comments/questions:

9

10 **General comments:**

11 1. *How can AOD distinguish and constrain 20 different aerosol state variables?*

12 *What is the impact of using only AOD? There is no mention of other studies that*  
13 *assimilate more information than just AOD (e.g. AOD in other wavelengths or*  
14 *Angstrom Exponent, Absorption Aerosol Optical Depth or Single Scattering*  
15 *Albedo as well as direct radiances assimilation). Although the authors*  
16 *acknowledge the need for combine assimilation of various optical properties in*  
17 *their closing statement in conclusions (L746-751), many recent studies that are*  
18 *related to that are not mentioned. To name a few ones: (Chen et al., 2019;*  
19 *Escribano et al., 2017; Tsikerdekiset al., 2021)*

20 **Response:**

21 Thank you very much for your questions and suggestions. First, the forward  
22 observation operator links aerosol optical properties (including AOD, extinction  
23 coefficient, backscattering coefficient, and total attenuated backscattering coefficient)  
24 with 20 different state variables in the data assimilation system, which means that AOD  
25 observations distinguish and constrain 20 different state variables via the forward

26 operator. Designing and establishing the observation operator is crucial to directly  
27 assimilate optical properties in case that control or state variables are mass  
28 concentrations instead of optical properties. Fortunately, we can reduce the aerosol  
29 Optical Module within WRF-Chem to establish the forward operator, which is based on  
30 the Mie-scatter theory. Different aerosol species described by 20 aerosol state variables  
31 here make greatly different contributions to AOD, even for the same species, particles  
32 within different size bins make different contributions. The operator can quantify these  
33 contributions. Specifically, AOD can constrain particle size and number, and then  
34 adjust individual species mass concentrations denoted by 20 different aerosol state  
35 variables. Second. Only AOD observation was chosen to test the developed  
36 assimilation system, its impact may be insufficient for significantly improving aerosol  
37 forecasts. It is noted that the developed assimilation system can assimilate extinction  
38 and backscattering profiles, AOD, and attenuated backscattering at different  
39 wavelengths because the wavelength is designed as a variable parameter in the  
40 assimilation system when establishing the observation operator, but it can not  
41 assimilate other optical properties such as Angstrom Exponent, Absorption Aerosol  
42 Optical Depth or Single Scattering Albedo as well as direct radiances (Assimilating  
43 aerosol direct radiance is very challenging because it is affected by many factors).  
44 Nevertheless, we will attempt to combine assimilate more aerosol optical properties to  
45 constrain model variable more accurately in the near future work. Finally, some recent  
46 studies related to combined assimilation of various optical properties have been added  
47 in the revised version as “With the increase in aerosol observations, the simultaneous  
48 assimilation of aerosol observations from various platforms has become a trend, in  
49 particular combined assimilation of various optical properties has made great progress  
50 in recent year (Escribano et al., 2017; Chen et al., 2019; Tsikerdekiset al., 2021).”

51 (L399-402)

52 2. *The spatial aggregation of observations that the authors describe (aggregating*  
53 *observations in the spatial resolution of the model) is indeed often used in data*  
54 *assimilation studies. Although was there any consideration regarding the*  
55 *representation error of this aggregated observations? For example, was the*  
56 *observational error inflated by X amount because you were not using the original*  
57 *resolution of Himawari-8? (Lines 437-442)*

58 **Response:**

59 We really appreciate your valuable suggestion. We aggregated AOT observations  
60 in the spatial resolution of the model, which is also employed by other researchers  
61 (Yumimoto et al., 2016; Dai et al., 2019; Ha et al., 2020). The observation error plays  
62 an important role in assimilation process. In general, the observation error depends on  
63 measurement error and representation error, however, it is very difficult to accurately  
64 determine the representation error because the released AOT product gives the  
65 retrieval uncertainty rather than representation error, what is more, the retrieval  
66 uncertainty is just a reference range. Consequently, the observation error here can  
67 only be roughly determined based on experience or tuning parameter. Aggregating  
68 AOT observations by averaging them in one grid cell can not inflate observation error,  
69 conversely, this approach can smooth out much noise to improve the quality. At least,  
70 the assimilation practice has demonstrated that assimilating aggregated AOT  
71 observations is better than original observations.

72 3. *As a geostationary satellite, Himawari-8 is known for its high temporal frequency.*  
73 *Since the data assimilation cycle is in daily frequency (updating analysis once a*  
74 *day), are you fully exploiting this satellite capabilities or rather its strong point? I*  
75 *realize that the daily assimilation step was chosen for practical reasons*

76 *(computational speed), nevertheless I would expect some discussion about it.*  
77 *Further related to this topic, I did not find any discussion related to temporal*  
78 *collocation of observation in the data assimilation system.*

79 **Response:**

80 We really appreciate your suggestion. Himawari-8 level 3 AOT\_Merged, an  
81 improved hourly product, which is derived from level 2 AOT retrievals at a 10 min  
82 interval, was employed to conduct assimilation experiments. A daily assimilation  
83 frequency seems to be an underutilization of Himawari-8 observations in comparison  
84 to its high temporal frequency. Since AOT observations are retrieved at the visible and  
85 infrared bands, observations between 03 and 08 UTC in the daytime are available for  
86 China. In fact, AOT observations are noticeably noisy, which will have a greatly  
87 negative impact on assimilation results. What is more, observations at afternoon are  
88 much noisier than those in the morning. For example, surface PM<sub>2.5</sub> concentration and  
89 original (not thinned) Himawari-8 AOT observations at 0300 UTC and 0600 UTC are  
90 plotted in Fig. 1 and Fig. 2, respectively. Overall, surface PM<sub>2.5</sub> mass concentrations  
91 change little even with a small decrease at some areas from 0300 to 0600 UTC (Fig.  
92 1b, Fig. 2b) while there is a remarkably increase in AOTs during the same period (Fig.  
93 1a, Fig. 2a). In terms of PM<sub>2.5</sub>, the noticeably increase in AOT observations should  
94 not be considered as normal changes of aerosol but much noises. As a result, more  
95 frequent assimilation of AOT observations like this will certainly result in a dramatic  
96 overestimation of PM<sub>2.5</sub> mass concentrations. In terms of evaluation with PM<sub>2.5</sub> mass  
97 concentration observations, AOT observations at 0300 UTC without no temporal  
98 collocation were only assimilated in this study to test the developed assimilation  
99 system. As known, data assimilation serves only as a mathematical approach on how  
100 to introduce observations into the model, and then improves model initializations and

101 forecasts. Assimilation results are largely determined by the quality of observational  
102 data, as for how to deal with those with high noise and improve the quality, more  
103 researches are needed in the future. Moreover, the advanced DA system such as  
104 4DVAR will be developed in the future that can assimilate observational data from a  
105 time window.

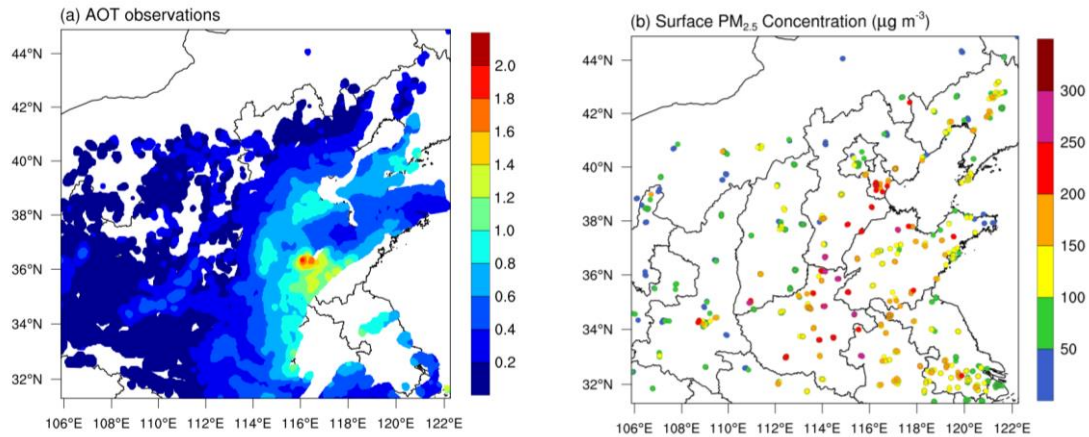

**Figure 1. Observations of the original (not thinned) Himawari-8 AOTs (a) and surface PM<sub>2.5</sub> mass concentration (b) in D02 at 0300 UTC on 25 November 2018.**

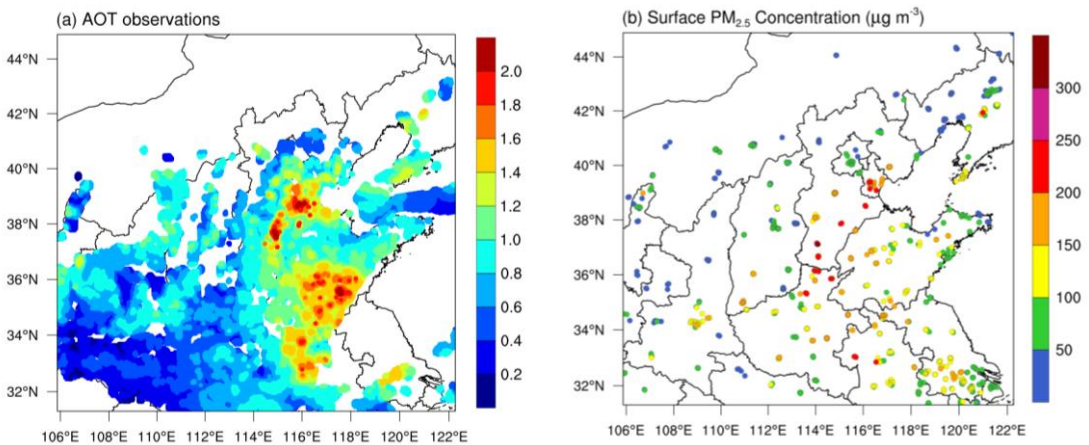

**Figure 2. Same as Fig.1, but at 0600 UTC on 25 November 2018.**

106

107 **Specific Comments:**

108 4. L60: Missing references.

109 **Response:**

110 We really appreciated the suggestion and followed it. Three references have been  
111 added here (L61).

112 Menon, S., Hansen, j., Nazarenko, L., and Luo, Y.: Climate Effects of Black  
113 Carbon Aerosols in China and India, *Science*, 297, 2250–2253.  
114 <https://doi.org/10.1126/science.1075159>, 2002.

115 Gao, M., Guttikunda, S. K., Carmichael, G. R., Wang, Y., Liu, Z., Stanier, C. O.,  
116 Saide, P. E., and Yu, M.: Health impacts and economic losses assessment of the 2013  
117 severe haze event in Beijing area, *Sci. Total. Environ.*, 511, 553–561,  
118 <https://doi.org/10.1016/j.scitotenv.2015.01.005>, 2015.

119 Qian, Y., Gong, D., Fan, J., Leung, L.R., Bennartz, R., Chen, D., and Wang, W.:  
120 Heavy pollution suppresses light rain in China: Observations and modeling, *J.*  
121 *Geophys. Res.*, 114, D00K02, <https://doi.org/10.1029/2008JD011575>, 2009.

122 5. *L65-67: Reference, name and accessibility (or the lack of) for this dataset should*  
123 *be provided.*

124 **Response:**

125 We really appreciate your valuable suggestion. This dataset is provided by China  
126 National Environmental Monitoring Centre (CNEMC) but has no official name. This  
127 sentence has been revised as “For instance, China National Environmental Monitoring  
128 Centre (CNEMC, <http://www.cnemc.cn/en/>) has established a nationwide monitoring  
129 network consisting of more than 1500 stations since 2013 to provide near-time data of  
130 pollutants, including PM<sub>2.5</sub>, PM<sub>10</sub>, SO<sub>2</sub>, NO<sub>2</sub>, CO, and O<sub>3</sub>.”(L66-67)

131 6. *L73: Probably mean “remote sensing optical properties can cover a much larger*  
132 *domain”. Because just optical properties can be retrieved also from AERONET*  
133 *stations.*

134 **Response:**

135 Thank you so much for your valuable suggestion. The sentence has been revised  
136 as “Remote sensing optical properties can cover a much larger domain (Kaufman et

137 al., 2002) and provide detailed aerosol profiles (Young and Vaughan, 2009)” (L75-76),  
138 at the same time, this reference has been added in the revised manuscript (“Young, S.  
139 A. and Vaughan, M. A.: The retrieval of profiles of particulate extinction from  
140 Cloud-Aerosol Lidar Infrared Pathfinder Satellite Observations (CALIPSO) data:  
141 Algorithm description, J. Atmos. Ocean. Tech., 26, 1105–1119,  
142 <https://doi.org/10.1175/2008JTECHA1221.1>, 2009.”)

143 7. L189-192: *In principle PM<sub>2.5</sub> can be estimate from the modes that the MADE*  
144 *scheme uses, assuming you know the median and the standard deviation of the*  
145 *distribution for each mode. In that case MADE would be superior to MOSAIC*  
146 *since it will also include mixing of different species within each mode. So I would*  
147 *suggest to emphasize only the numerical efficiency of MOSAIC against MADE.*  
148 *Further, indicating how much faster it is could really promote that argument and it*  
149 *could be easily estimated with two forward simulations, one with MADE one with*  
150 *MOSAIC (no DA required).*

151 **Response:**

152 Thank you so much for your valuable suggestion. We agree well with you. Due  
153 to its simplicity and high numerical efficiency, the MOSAIC scheme has been chosen  
154 to develop the data assimilation system. Consequently, it seems to unnecessary to  
155 discuss how much faster is MOSAIC against MADE for aerosol simulations in the  
156 context of testing the assimilation system.

157 8. L211-213: *Authors could mention here that the vertical axis is on hybrid*  
158 *sigma-pressure levels, if that is the case.*

159 **Response:**

160 We followed this suggestion and this sentence has been revised as “To ensure a  
161 detailed simulation of aerosol vertical distributions, 40 vertical layers were modelled

162 in the simulation, and it is worth mentioning that the vertical axis is on hybrid  
163 sigma-pressure levels with a resolution decreasing with height. The lowest layer is at  
164 the surface, whereas the top reaches 50 hPa”. (L214-215)

165 9. L237-238: *It would be really helpful to briefly mention here how Yumimoto et al.*  
166 *(2016) estimated this error for Himwari-8 AOD and what this error actually*  
167 *describes (e.g. instrument error, retrieval error, representation error) ?*

168 **Response:**

169 Thank you so much for your valuable suggestion. Yumimoto et al. (2016)  
170 estimated observation errors to be the retrieval uncertainty attached to the Himawari-8  
171 AOT data plus a standard deviation calculated as the representative error in the  
172 regriding (Zhang et al., 2008, see below). The retrieval uncertainty ranged from  
173 0.0001 to 1.04 with average of 0.013 and has larger values in the land relative to over  
174 the ocean.

175 The observation error plays an important role in assimilation process, however,  
176 no relevant theoretical basis has been found so far. The observation error depends on  
177 measurement error and representation error (Elbern and Schmidt, 2001; Schwartz et al.,  
178 2012; Jiang et al., 2013), nevertheless, how to determine the observation error is also a  
179 matter of assimilation practice. Because the observation error determines the weight of  
180 observation across the analysis, that is, the smaller the observation error, the greater the  
181 absolute value of the assimilation incremental field are, and the closer the assimilation  
182 analysis field are to the observation field deviating from the background field. In other  
183 words, no matter how large the observation error is, as long as the observation operator  
184 is correct, the assimilation analysis field will always fall between the background field  
185 and the observation field and has a positive assimilation effect, even though not the best.  
186 In this study, AOT observation error was set to be a simple value which is rational only



187 to test the developed assimilation system.

188 Zhang, J., Reid, J. S., Westphal, D. L., Baker, N. L., and Hyer, E. J.: A system for  
189 operational aerosol optical depth data assimilation over global oceans, *J. Geophys. Res.*,  
190 113, D10208, <https://doi.org/10.1029/2007JD009065>, 2008.

191 *10. L491-493: It would be interesting to compare the D02 and D01 estimated*  
192 *background error standard deviation. It would show how important is the model*  
193 *horizontal resolution for this metric. If possible an additional plot for the D01*  
194 *over the domain of D02.*

195 **Response:**

196 We really appreciated the suggestion. Because both D01 and D01 outputs were  
197 assimilated using AOT observations in this study, background error covariance  
198 including standard derivation and correlation was estimated in D01 and D02,  
199 respectively. Only the estimated background error standard deviation in D02 was  
200 shown in manuscript, as shown in Fig .3b here, the D01 estimated background error  
201 standard deviation looks actually like D02, as shown in Fig. 3a. Obviously, the D02  
202 estimated background error standard deviation is nearly twice than D01 estimated  
203 ones, whereas the D01 model horizontal resolution is 27km and D02 is 9km. The  
204 background error standard deviation determines the magnitude of analysis increments  
205 across aerosol control variables. As these two plots look alike, it seems unnecessary to  
206 add the plot for D01.

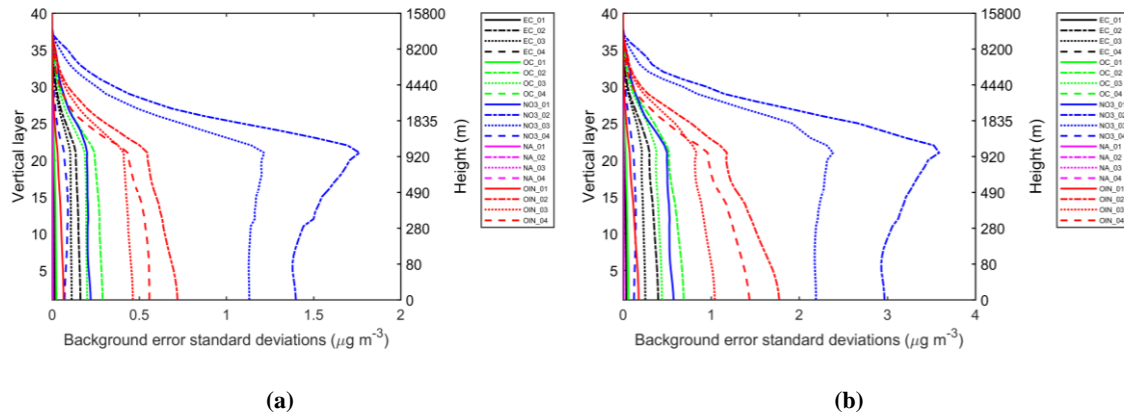

Figure 3. Vertical profiles of background error standard deviation in mass concentration for aerosol control variables, (a) is for D01, and (b) is for D02.

207

208 *11. L562: I would strongly recommend to replace “improvements” with “changes” in*  
 209 *that sentence or rephrase. Figure 6 shows the differences of the Analysis – Control.*  
 210 *It is not an evaluation with observations (assimilated or independent) where we*  
 211 *can truly determine if there was an improvement by the data assimilation.*

212 **Response:**

213 The word “improvements” has been replaced by “changes” (L571).

214 *12. L585-587: It would be beneficial to provide how much this difference in AOD*  
 215 *wavelength (500nm and 550nm) is affecting your evaluation. Maybe you can use*  
 216 *Angstrom Exponent from AERONET to determine that and provide a number?*  
 217 *Usually AOD at higher wavelength (550nm) is smaller than AOD at lower*  
 218 *wavelength (500nm). Which means that the bias would be even more negative if*  
 219 *you were comparing MODIS and Model at the same wavelength at Figure 7b. I*  
 220 *think it is worth discussing in the manuscript (L595+) although it may enhance*  
 221 *the negative bias you get for both Control and Analysis.*

222 **Response:**

223 We really appreciated the suggestion and followed it, AOD simulation was  
 224 performed at a wavelength of 500 nm, the same as Himawari-8 retrievals, whereas

225 MODIS AOD is retrieved at 550 nm. Even though this difference in AOD wavelength  
226 may affect the evaluation, it is naturally convincing to evaluate AOD simulation  
227 directly employing MODIS AOD because the wavelength difference is minor.

228 There is no doubt that your suggestion will certainly improve the manuscript, and  
229 the following information has been added in the revised manuscript (L607-612).

230 Usually AOD at higher wavelength (550 nm) is smaller than AOD at lower  
231 wavelength (500 nm), so the bias would be even more negative if comparing AOD  
232 simulations with MODIS AOD for both Control and Analysis, which is demonstrated  
233 by the indicator BIAS in Fig. 7. For instance, BIAS is -0.031 when comparing with  
234 Himawari-8 AOD, while BIAS is -0.140 against MODIS AOD after assimilation.

235 *13. L604-606: AERONET sites at Figure 1b are hardly visible (probably because 4 of*  
236 *them are in the Beijing area). It would be visually better to enlarge them a bit.*

237 **Response:**

238 We really appreciated and followed the suggestion, and have added a zoomed-in  
239 map as Fig. 1c for AERONET sites in Beijing area in the revised version, which is  
240 also given as Fig. 4 below:

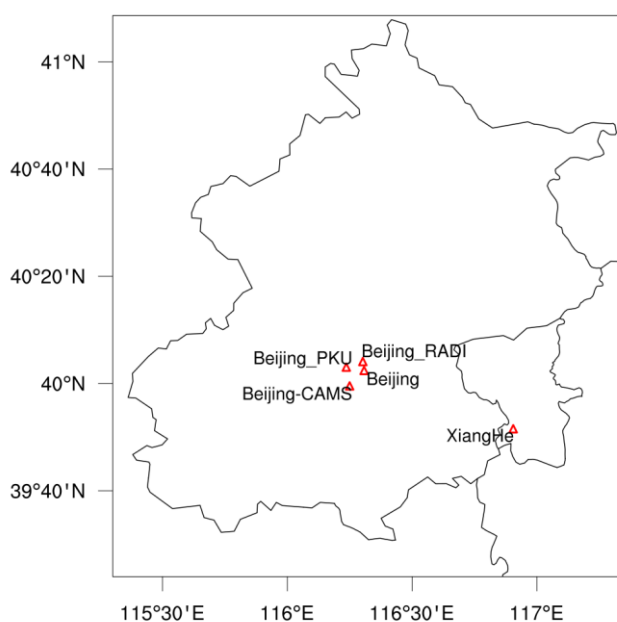

Figure 4. A zoomed-in map for AERONET sites in Beijing area, including Beijing, Beijing-CAMS, Beijing\_PKU, Beijing\_RADI, XiangHe.

241

242 14. L664-669: *Good point, spatial availability of AOD in contrast to PM<sub>2.5</sub> can play*  
243 *a role. I would also add that AOD is an atmospheric column measurement while*  
244 *PM<sub>2.5</sub> is a surface measurement. Therefore, if you have an aerosol plume which is*  
245 *not close to the surface AOD can be increased by increasing the aerosol*  
246 *concentration of that plume while PM<sub>2.5</sub> can remain almost unaffected by that*  
247 *change.*

248 **Response:**

249 We really appreciated and followed the suggestion, and have added the following  
250 descriptions in the revised manuscript (L694-697).

251 Besides, AOD is an atmospheric column measurement while PM<sub>2.5</sub> is a surface  
252 measurement. Therefore, if you have an aerosol plume which is not close to the  
253 surface, AOD can be increased by increasing the aerosol concentration of that plume  
254 while PM<sub>2.5</sub> can remain almost unaffected by that change.

255

256 **Technical Corrections:**

257 L140: “3DAVR” to “3DVAR”

258 **Response:**

259 Done. (L143)

260 L173: “back carbon” to “black carbon”

261 **Response:**

262 Done. (L175-176)

263 L203: “/MADE/” is some kind of typo?

264 **Response:**

265 This sentence has been revised as “the Regional Acid Deposition Model, Version  
266 2 (RADM2, Stockwell et al., 1990), the Modal Aerosol Dynamics Model for Europe  
267 (MADE, Ackermann et al., 1998)/Second Organic Aerosol Model (SORGAM, Schell  
268 et al., 2001) anthropogenic emissions.” (L206-207)

269 *L291: “black carton, organic carton” to “black carbon, organic carbon”*

270 **Response:**

271 Done. (L294-295)

272 *L609: Something is missing in the sentence. Probably “used to” to “used them to”*

273 **Response:**

274 Done. (L622)

275 *L1185: Figure 11: Do you mean “average over 7 analysis steps” instead of “average  
276 over 7 single experiments”?*

277 **Response:**

278 We really appreciated and followed the suggestion. Two one-week parallel  
279 experiments have been performed to evaluate AOD assimilation effects regarding to  
280 24 h regional PM<sub>2.5</sub> forecasts. For a general assessment, the statistics were averaged  
281 over 7 analysis steps. (L1213)

282

283

284 We would like to express our great appreciation to you for the valuable and  
285 pertinent comment on our manuscript, which is crucial to improve the quality of our  
286 work. We hope that these revisions are satisfactory and that the revised version will be  
287 acceptable for publication in Geoscientific Model Development. Thank you very much  
288 for your work concerning my paper.

289 Wish you all the best!

290 Yours sincerely,

291 Daichun Wang and Wei You

292 11/23/2021

293

---
