# Supplementary material for: A three-dimensional variational data assimilation system for aerosol optical properties based on WRF-Chem: design, development, and application of assimilating Himawari-8 aerosol observations
Source: Copernicus journal article supplement (doi:10.5194/gmd-2021-215), 2021-09-29
Supplement: Supplementary file [file gmd-2021-215-AC3-supplement.pdf]

1 **Responses to the comments of Reviewer #2:**

2 We are truly grateful to yours' positive comments and thoughtful suggestions.  
3 Those comments are all valuable and very helpful for revising and improving our paper,  
4 as well as the important guiding significance to our researches. Based on these  
5 comments and suggestions, we have studied comments carefully and have made  
6 correction which we hope meet with approval. All changes made to the text are marked  
7 in green color. Below you will find our point-by-point responses to the reviewers'  
8 comments/questions:

9

10 **Major Comments:**

11 *1. Using a constant observational error covariance of 0.06 seems not very convincing.*  
12 *For AOD of 1.8, the error is only 3.3%. Is this realistic? The observational error*  
13 *plays an important role in the DA analysis. Some justification for using this value is*  
14 *needed.*

15 **Response:**

16 We really appreciate your question. The observation error plays an important role  
17 in assimilation process, however, no relevant theoretical basis on its construction has  
18 been found so far. The observation error depends on measurement error and  
19 representation error (Elbern and Schmidt, 2001; Schwartz et al., 2012; Jiang et al.,  
20 2013), and is difficult to accurately estimate so that how to determine it is also a  
21 matter of assimilation practice. In several studies, the observation error is given by a  
22 tuning parameters. Based on the 3DVAR principle, the function of the observation  
23 error can be easily analyzed, namely, the observation error determines the weight of  
24 observation across the analysis. Given a background field, the smaller observation  
25 error produces the greater increments in terms of absolute value to make the analysis

26 closer to observations and away from the background field and vice versa. No matter  
27 how large the observation error is, as long as the observation operator is correct, the  
28 generated analysis theoretically will fall between the background field and  
29 observations, demonstrating a positive assimilation effect, even though not the best.  
30 Consequently, it is inclined to construct the simple observation error to run the  
31 assimilation system in practice. It is apparent that using a constant observation error  
32 only to test the developed system is rational.

33 Even though the observation error can be roughly determined based on  
34 experience, it is necessary to select a rational value. According to Yumimoto et al.  
35 (2016), the observation error was estimated to be the retrieval uncertainty attached to  
36 the Himawari-8 AOT data plus a standard deviation calculated as the representative  
37 error in the regridding. The retrieval uncertainty ranged from 0.0001 to 1.04 with  
38 average of 0.013 and has larger values in the land relative to over the ocean. Thus it  
39 can be seen that using a constant observation error of 0.06 is rational in this study,  
40 which is also obtained after several tests. As you mentioned, as for AOD of 1.8, the  
41 value seems somewhat irrational, but these high AOD data account for a small  
42 proportion during the study period. It should be pointed out that the observation error  
43 varies with data values, which also needs some further researches in the future.

44 *2. More detailed information in numerical experiment design is needed. Is AOD DA*  
45 *performed every hour whenever AOD data are available? Does the forecast last for*  
46 *24 h only? For each 24-h DA cycle, are the meteorological data in the first guess*  
47 *from FNL or from data at the end of the previous cycle? Similarly, for each forecast*  
48 *starting at 0300 UTC, while aerosols are taken from the analysis after a 24-h DA*  
49 *cycle for the Analysis run and from the previous 24-h forecast for the Control run,*  
50 *are meteorological conditions taken from FNL?*

51 **Response:**

52 We really appreciate your question. AOD DA is not performed every hour during  
53 the period of 0300 UTC to 0800 UTC when the Himawari-8 AOD observations are  
54 available for China. AOD observations at 0300 UTC every day from 23 to 29  
55 November 2018 was only assimilated to provide the analysis (L460-461), and the  
56 forecast last for 24 h, which means that the assimilation frequency is 24 h. Comparing  
57 to its high temporal resolution (an hourly product), the 24-h assimilation frequency  
58 seems to be an underutilization of AOD observations. However, the AOD retrievals  
59 are found with much noise, which will have a significantly negative impact on  
60 assimilation. For example, surface  $PM_{2.5}$  concentration and original (not thinned)  
61 Himawari-8 AOD observations at 0300 UTC and 0600 UTC are plotted in Fig. 1 and  
62 Fig. 2, respectively. Overall, surface  $PM_{2.5}$  mass concentrations change little even  
63 with a small decrease at some areas from 0300 to 0600 UTC (Fig. 1b, Fig. 2b) while  
64 there is a remarkably increase in AODs during the same period (Fig. 1a, Fig. 2a). In  
65 terms of  $PM_{2.5}$ , the noticeably increase in AOD observations should not be considered  
66 as normal changes of aerosol but much noise. As a result, more frequent assimilation  
67 of AOD observations like this will certainly result in a dramatic overestimation of  
68  $PM_{2.5}$  mass concentrations. In terms of evaluation with  $PM_{2.5}$  mass concentration  
69 observations, AOD observations at 0300 UTC without no temporal collocation were  
70 only assimilated in this study to test the developed assimilation system. As known,  
71 DA serves only as a mathematical approach on how to introduce observations into the  
72 model, and then improves model initial and forecast fields. Assimilation results are  
73 largely determined by observational data, as for how to deal with those with much  
74 noise and improve the quality, more researches are needed in the future.

75 Additionally, for each 24-h DA cycle, the meteorological data in the first guess

76 are from FNL, and the meteorological conditions in both the Analysis run and Control  
77 run are taken from FNL, meaning that the Analysis run and Control run utilized the  
78 same meteorological conditions. It should be noted that meteorological states were not  
79 assimilated in this study because the developed DA system has no capacity of  
80 assimilating meteorological data, which aims at aerosol DA.

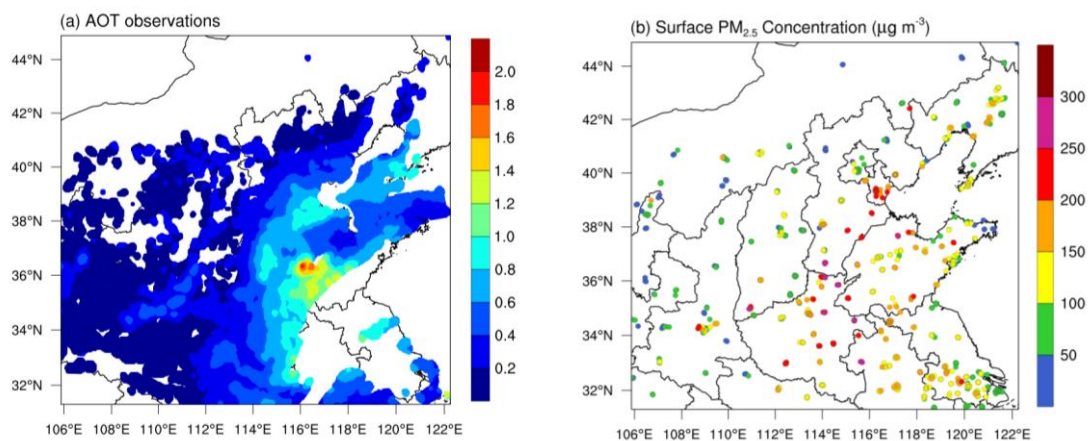

**Figure 1. Observations of the original (not thinned) Himawari-8 AOTs (a) and surface PM<sub>2.5</sub> mass concentration (b) in D02 at 0300 UTC on 25 November 2018.**

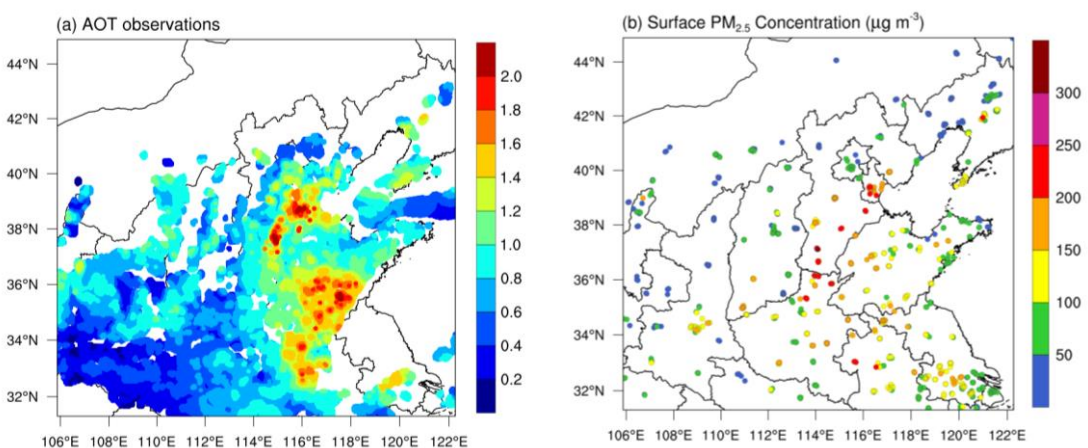

**Figure 2. Same as Fig.1, but at 0600 UTC on 25 November 2018.**

81

82 *3. The development of assimilating optical properties was built on the framework of Li*  
83 *et al. (2013). The authors should discuss major differences between the two analysis*  
84 *systems and major differences in the conclusions of the two studies.*

85 **Response:**

86 We really appreciate your question. The DA system presented in this manuscript

87 is an upgrade of that developed by Li et al. (2013). Li et al. (2013) developed a  
88 3DVAR aerosol DA system to work with the sectional scheme MOSAIC within  
89 WRF-Chem for the first time. However, it can only assimilate aerosol mass  
90 concentrations, including total mass such as PM<sub>2.5</sub> and PM<sub>10</sub> and composition mass,  
91 without the ability of assimilating aerosol optical properties. In order to develop the  
92 DA system for aerosol optical properties, the basic framework of Li et al. (2013)  
93 including the minimization process as well as the **B**-matrix computation was  
94 employed, but new aerosol state variables are designed based on the MOSAIC scheme.  
95 There are a total of 20 state variables in this DA system while there are 5 variables in  
96 Li et al., (2013). More importantly, an optical module consisting of the nonlinear  
97 forward operator achieved by simplifying the Optical Module inside the WRF-Chem  
98 model and its tangent linear (TL) as well as adjoint (AD) codes has been added in  
99 order to directly assimilate optical properties. In the study of Li et al. (2013), PM<sub>2.5</sub>  
100 mass assimilation has a significant improvement for PM<sub>2.5</sub> initial conditions and its  
101 24-h subsequent forecasts, whereas, this study mainly focus on the validation of the  
102 new development with AOD observations and shows that AOD assimilation improves  
103 24-h PM<sub>2.5</sub> forecasts and model AOD initial simulations.

104 *4. The improvement of aerosol forecasts only lasts for 24 hours in this study. Although*  
105 *Li et al. (2013) also showed a similar result, this seems a little bit short in terms of*  
106 *forecast length. Some studies have shown the benefit of assimilating AOD data in*  
107 *longer aerosol forecasts (48 h), such as Benedetti, et al. 2019 and Choi et al. 2020.*  
108 *Could it be due to, for example, no assimilation of meteorological data, the quality*  
109 *of AOD data, the assimilation method, the study location, etc.? The authors should*  
110 *compare their results with others' or make some comments about this issue (24 h*  
111 *versus 48 h).*

112 **Response:**

113 We really appreciate your suggestion. In short, the benefit of assimilating AOD  
114 data can last longer than 48 h in the studies conducted by Benedetti et al. (2019) and  
115 Choi et al. (2020), which is in terms of AOD simulations, however, the improvement  
116 lasting for 24 h in this study is in terms of PM<sub>2.5</sub> forecasts. It is obvious that the results  
117 can not be comparable. In our study, AOD assimilation significantly improves AOD  
118 initializations and simulations, but the improvement for the forecast length is not  
119 evaluated. Both Benedetti et al. (2019) and Choi et al. (2019) assimilated MODIS  
120 AOD to improve the dust analysis and forecasts. In the study of Choi et al. (2019),  
121 only MODIS AOD was employed to evaluate the assimilation benefits, whereas,  
122 independent AOD data from two established ground-based networks as well as PM<sub>10</sub>  
123 data from the China Environmental Protection Agency were used in the evaluation in  
124 the study of Benedetti et al. (2019). In spite of the better improvement for AOD  
125 simulations, the AOD assimilation can only make small adjustments to PM<sub>10</sub> but is  
126 unable to improve the quality of forecast fundamentally.

127

128 **Major Comments:**

129 5. Line 65. "... monitoring, for instance, China has..." should be "... monitoring.  
130 For instance, China has..."

131 **Response:**

132 We really appreciated and followed your valuable suggestion. This sentence has  
133 been revised as "For instance, China National Environmental Monitoring Centre  
134 (CNEMC, <http://www.cnemc.cn/en/>) has established a nationwide monitoring  
135 network consisting of more than 1500 stations since 2013 to provide near-time data of  
136 pollutants, including PM<sub>2.5</sub>, PM<sub>10</sub>, SO<sub>2</sub>, NO<sub>2</sub>, CO, and O<sub>3</sub>."(L66-67)

137 6. Line 74. "... detailed aerosol profiles (Kaufman et al., 2002), ..." Kaufman et al.,  
138 2002 used AOT and aerosol index for their study. Both are vertically integrated  
139 data and thus do not provide vertical profile information.

140 **Response:**

141 We really appreciated and followed your valuable suggestion. This sentence has  
142 been revised as "Remote sensing optical properties can cover a much larger domain  
143 (Kaufman et al., 2002) and provide detailed aerosol profiles (Young and Vaughan,  
144 2009)" (L75-76), at the same time, this piece of reference below has been added:

145 Young, S. A. and Vaughan, M. A.: The retrieval of profiles of particulate  
146 extinction from Cloud-Aerosol Lidar Infrared Pathfinder Satellite Observations  
147 (CALIPSO) data: Algorithm description, J. Atmos. Ocean. Tech., 26, 1105–1119,  
148 <https://doi.org/10.1175/2008JTECHA1221.1>, 2009.

149 7. Line 98. What does the "control variable scheme" mean? DA methods usually need  
150 control variables. Do you mean "...PM10, which is used as a control variable?"

151 **Response:**

152 We really appreciate your question. The control variable scheme means how  
153 many control variables, one or more, are employed in DA analysis. The early aerosol  
154 DA usually employed a control variable. For example, PM<sub>10</sub> (mass concentration)  
155 rather than its compositions is directly employed as the control variable so that  
156 observation is the control variable self.

157 8. Lines 120-122. I believe that ECMWF uses a 4DVAR method to assimilate AOD  
158 and it is an online approach. Check out Benedetti et al. 2019 paper listed above.

159 **Response:**

160 We really appreciate your suggestion. ECMWF has incorporated atmospheric  
161 composition variables into its 4DVAR meteorological assimilation analysis system.

162 The aerosol assimilation uses total aerosol mass rather than composition mass as a  
163 control variable, and it can only assimilate satellite-derived AODs and work with the  
164 global model. The sentence has been revised as “Although the four-dimensional  
165 variational (4DVAR) technique has been extensively used in operations (Gauthier et  
166 al., 2007; Benedetti et al., 2019), and has also been employed to assimilate  
167 atmospheric chemical compositions such as O<sub>3</sub>, SO<sub>2</sub>, and CO based on the simple  
168 offline chemical transport model (CTM) (Eibern and Schmidt, 1999; Elbern and  
169 Schmidt, 2001), it is greatly challenging to develop a 4DVAR DA system coupled  
170 with the sophisticated aerosol model such as MOSAIC because of the high  
171 computational cost and complex adjoint model” in the revised manuscript. (L121-127)

172 9. Lines 236-237. “...observation errors associated with AOD retrievals are  
173 determined by measuring instruments...” It is probably more than just the  
174 instrument itself, but also the retrieval algorithm and surface emissivity, to name a  
175 few.

176 **Response:**

177 Thank you so much for your correction. This sentence has been revised as “In  
178 general, observation errors associated with AOT retrievals are determined by  
179 measurement and representation errors (Elbern and Schmidt, 2001; Schwartz et al.,  
180 2012; Jiang et al., 2013)” in the revised manuscript. (L240-241)

181 10. Line 261. Define BEGS.

182 **Response:**

183 We are so sorry for the misspelling. It should be written as BFGS. The L-BFGS  
184 algorithm is a limited memory quasi-Newton method for large scale unconstrained  
185 optimization, which was developed by four mathematician Broyden, Fletcher,  
186 Goldfarb, and Shanno, BFGS is their initials. The L-BFGS code has been developed



187 at the Optimization Center, a joint venture of Argonne National Laboratory and  
188 Northwestern University (<http://users.iems.northwestern.edu/~nocedal/lbfgs.html>).

189 (L264)

190 11. Lines 440 and 442. *The data reduction used in this study is not a thinning*  
191 *procedure but a superobbing procedure.*

192 **Response:**

193 We really appreciate your question. We thinned AOD observations in the spatial  
194 resolution of the model, which is also employed by other researchers (Yumimoto et al.,  
195 2016; Dai et al., 2019; Ha et al., 2020). This approach certainly leads to a great data  
196 reduction, however, it can smooth out some noise in retrieved data to improve the  
197 quality, which is also of great significance for assimilation. At least, the assimilation  
198 practice has demonstrated that assimilating thinned AOD observations is better than  
199 original observations. More researches on how to thin data with a high spatial  
200 resolution are needed in the future.

201 12. Line 457. Add “AOT” in front of assimilation.

202 **Response:**

203 Done. (L466)

204 13. Line 569. “... with negative increments marked in blue.” *Improve the color*  
205 *shading in Figure 6c. Make warm and cold colors for positive and negative values,*  
206 *respectively. The current plot mixes red and blue colors for positive values, while it*  
207 *uses blue shading for negative values. This is confusing. A similar problem is seen*  
208 *in Figure 9c.*

209 **Response:**

210 Done. The color shadings in both Figure 6c and Figure 9c have been improved in  
211 the revised manuscript so that warm and cold colors are for positive and negative

212 values, respectively.

213 14. Line 594. "... BIAS increase..." This statement sounds like that the assimilation of  
214 AOD data makes the result worse, but it is not true. Need to rewrite this. The same  
215 for line 663.

216 **Response:**

217 We followed the suggestion. This statement has been rewritten as "BIAS is  
218 reduced by about 77 percent" (L603). The statement in line 663 has also been written  
219 as "reducing BIAS by 4.97 ug m<sup>-3</sup>" (L688).

220 15. Try to use words consistently throughout the paper, such as "cost function" versus  
221 "objective function", "AOD" versus "AOT", "Control" versus "control"  
222 experiment, and "Assimilation" versus "assimilation" experiment.

223 **Response:**

224 Done. We used the words "cost function", "AOT", "Control", and "Assimilation"  
225 consistently throughout the paper in the revised form.

226

227

228

229

230

231 We would like to express our great appreciation to you for the valuable and  
232 pertinent comment on our manuscript, which is crucial to improve the quality of our  
233 work. We hope that these revisions are satisfactory and that the revised version will be  
234 acceptable for publication in Geoscientific Model Development. Thank you very much  
235 for your work concerning my paper.

236 Wish you all the best!

237 Yours sincerely,

238 Daichun Wang and Wei You

239 11/23/2021

240

---
