# Supplementary material for: A three-dimensional variational data assimilation system for aerosol optical properties based on WRF-Chem: design, development, and application of assimilating Himawari-8 aerosol observations
Source: Copernicus journal article supplement (doi:10.5194/gmd-2021-215), 2021-09-29
Supplement: Supplementary file [file gmd-2021-215-AC5-supplement.pdf]

1 **Responses to the comments of Reviewer #4:**

2 We are truly grateful to yours' positive comments and thoughtful suggestions.  
3 Those comments are all valuable and very helpful for revising and improving our paper,  
4 as well as the important guiding significance to our researches. Based on these  
5 comments and suggestions, we have studied comments carefully and have made  
6 correction which we hope meet with approval. All changes made to the text are marked  
7 in blue color. Below you will find our point-by-point responses to the reviewers'  
8 comments/questions:

9

10 **Specific Comments:**

11 1. *L144 duo to->due to*

12 **Response:**

13 Done. (L147)

14 2. *L291 carton-> carbon*

15 **Response:**

16 Done. (L294)

17 3. *L305 What do you mean distributing the increments using the mass concentration*  
18 *background error STD? Please clarify this.*

19 **Response:**

20 We really appreciated your question. The assimilation process will directly  
21 generate analysis increments of 20 control variables, however, these control variables  
22 are not completely consistent with model variables within MOSAIC. For those  
23 consistent with model variables, their increments can be directly used to adjust model  
24 variables, while for those lumped control variables, their increments correspond to 2  
25 or 3 model variables, for instance, the control variable SSN1 correspond to 3 model

26 variables, i.e. *so4\_a01*, *no3\_a01*, and *nh4\_a01*, which are sulfate, nitrate, ammonium  
27 mass concentrations at the first size bin, respectively, thus, distributing the increment  
28 of SSN1 over three model variables *so4\_a01*, *no3\_a01*, and *nh4\_a01* is necessary.  
29 How to distribute? A simple way is to determine the distribution ratio. When  
30 estimating background error covariance using the NMC method, we can employ  
31 differences between 48 h and 24 h forecasts valid at the same time (i.e. 0000 UTC) for  
32 every model variable within a period of one month (November 2018) to set up a  
33 sample and figure out the background error standard deviation (STD) in mass  
34 concentration. For example, the computed STDs of *so4\_a01*, *no3\_a01*, and  
35 *nh4\_a01* are  $c_1$ ,  $c_2$ , and  $c_3$ , respectively, thus, the corresponding distribution ratios are  
36 calculated as  $c_1/(c_1+c_2+c_3)$ ,  $c_2/(c_1+c_2+c_3)$ ,  $c_3/(c_1+c_2+c_3)$ .

37 *4. L540 You said the vertical correlation of every variable is similar, however, you*  
38 *subsequently said vertical correlations differ among aerosol variables. Please*  
39 *clarify it. Besides, since the AOT observation has no vertical information, how do*  
40 *you assume the vertical information of the AOT observations?*

41 **Response:**

42 We really appreciated your question. We said the vertical correlation of every  
43 variable is similar, meaning that vertical correlation plots for every variable look  
44 similar. Because the vertical correlation describes the auto-correlation between two  
45 layers at different heights, the vertical correlation is a symmetric matrix and the  
46 maximum 1 is on the diagonal, which is common to all variables. Therefore, the  
47 vertical correlation of every variable is similar. However, vertical correlations among  
48 aerosol variables are not the same. Given a correlation more than 0.8, some variables  
49 have a larger domain while some have a less domain, which indicates that vertical  
50 correlations differ among aerosol variables.

51 AOT is an atmospheric column measurement, it has no vertical information.  
52 When assimilating AOT observations, it does not need to assume the vertical  
53 information of the AOT observations.

54 5. *Fig.7 Can you explain why the assimilation has little effects on the significant*  
55 *underestimates of the AOTs? Such as the observed AOTs are around 1-1.5,*  
56 *whereas the simulated ones are around 0.*

57 **Response:**

58 Thank you so much for your question. In general, the assimilation has significant  
59 effects on AOT simulation, but has little effects on the some significant  
60 underestimates of the AOTs. This phenomenon is probably due to uncertainties in  
61 aerosol emissions as well as meteorological boundary conditions. Emission data is  
62 another important factor that influences the aerosol simulation. Simultaneous  
63 assimilation of aerosol data to updating aerosol emission and initial field may reduce  
64 this phenomenon in the future.

65

66

67

68

69 We would like to express our great appreciation to you for the valuable and  
70 pertinent comment on our manuscript, which is crucial to improve the quality of our  
71 work. We hope that these revisions are satisfactory and that the revised version will be  
72 acceptable for publication in Geoscientific Model Development. Thank you very much  
73 for your work concerning my paper.

74 Wish you all the best!

75 Yours sincerely,

76 Daichun Wang and Wei You

77 11/24/2021

78

---
